# Supplementary material for: Prediction of flavor and retention index for compounds in beer depending on molecular structure using a machine learning method
Source: Royal Society of Chemistry journal article supplement (doi:10.1039/d1ra06551c), 2021-01-01
Supplement: d1ra06551c1.pdf [file d1ra06551c1.pdf]

Supplementary table 1. The database of all 301 selected flavor compounds.

| pubchem_<br>cid | cas                                      | canonical_smiles                             | chemical_name                                 | flavor   |
|-----------------|------------------------------------------|----------------------------------------------|-----------------------------------------------|----------|
| 11039           | 547-63-7                                 | <chem>O=C(OC)C(C)C</chem>                    | methyl 2-methylpropanoate                     | aromatic |
| 7342            | 97-62-1                                  | <chem>O=C(OCC)C(C)C</chem>                   | ethyl 2-methylpropanoate                      | aromatic |
| 13357           | 868-57-5                                 | <chem>O=C(OC)C(CC)C</chem>                   | methyl 2-methylbutanoate                      | aromatic |
| 24020           | 7452-79-<br>1/53956-13-1                 | <chem>O=C(OCC)C(CC)<br/>C</chem>             | ethyl 2-methylbutanoate                       | aromatic |
| 6560            | 78-83-1                                  | <chem>OCC(C)C</chem>                         | 2-methylpropan-1-ol                           | aromatic |
| 31276           | 123-92-2                                 | <chem>O=C(OCCC(C)C)<br/>C</chem>             | 3-methylbutyl acetate                         | aromatic |
| 162239          | 37064-20-3                               | <chem>O=C(OCCC)C(CC)<br/>)C</chem>           | propyl 2-methylbutanoate                      | aromatic |
| 31265           | 123-66-0                                 | <chem>O=C(OCC)CCCC<br/>C</chem>              | ethyl hexanoate                               | aromatic |
| 522834          | 85213-22-5                               | <chem>O=C(C)C1=NCCC<br/>1</chem>             | 2-acetyl-1-pyrroline                          | other    |
| 5352367         | 19883-27-<br>3/51447-08-<br>6/16356-11-9 | <chem>C(C=CCCCC)=<br/>CC=C</chem>            | (3E,5Z)-undeca-1,3,5-triene                   | aromatic |
| 176             | 64-19-7                                  | <chem>O=C(O)C</chem>                         | acetic acid                                   | other    |
| 18635           | 3268-49-3                                | <chem>S(CCC=O)C</chem>                       | 3-(methylsulfanyl)propanal                    | sulfury  |
| 1032            | 29102                                    | <chem>O=C(O)CC</chem>                        | propanoic acid                                | other    |
| 6549            | 78-70-6                                  | <chem>OC(C=C)(CCC=C<br/>(C)C)C</chem>        | linalool                                      | aromatic |
| 6590            | 79-31-2                                  | <chem>O=C(O)C(C)C</chem>                     | 2-methylpropanoic acid                        | other    |
| 264             | 203-532-3                                | <chem>O=C(O)CCC</chem>                       | butanoic acid                                 | other    |
| 10448           | 505-10-2                                 | <chem>S(CCCO)C</chem>                        | 3-(methylsulfanyl)propan-1-ol                 | sulfury  |
| 5366074         | 23696-85-<br>7/23726-93-4                | <chem>O=C(C=CC)C1=C<br/>(C)C=CCC1(C)C</chem> | (E)-damascenone                               | aromatic |
| 637566          | 106-24-1                                 | <chem>OCC=C(CCC=C(<br/>C)C)C</chem>          | geraniol                                      | aromatic |
| 6054            | 22258                                    | <chem>OCCc1ccccc1</chem>                     | 2-phenylethan-1-ol                            | aromatic |
| 638014          | 79-77-6                                  | <chem>O=C(C=CC=1C(C<br/>)C)CCCC=1C)C</chem>  | ionone                                        | aromatic |
| 33931           | 27538-10-9                               | <chem>O=C1C(O)=C(C)<br/>OC1CC</chem>         | 2-Ethyl-4-hydroxy-5-<br>methylfuran-3(2H)-one | other    |
| 62835           | 28664-35-9                               | <chem>O=C1C(O)=C(C)C<br/>(C)O1</chem>        | sotolon                                       | other    |
| 332             | 7786-61-<br>0/31853-85-7                 | <chem>O(C)c1c(O)ccc(C=<br/>C)c1</chem>       | 2-methoxy-4-vinylphenol                       | other    |
| 11952           | 613-89-8                                 | <chem>O=C(CN)c1ccccc1</chem>                 | 2-aminoacetophenone                           | other    |
| 61199           | 698-10-2                                 | <chem>O=C1C(O)=C(C)C<br/>(CC)O1</chem>       | abhexone                                      | other    |

|         |                     |                                    |                         |          |
|---------|---------------------|------------------------------------|-------------------------|----------|
| 999     | 103-82-2            | <chem>O=C(O)Cc1ccccc1</chem>       | phenylacetic acid       | aromatic |
| 1183    | 121-33-5            | <chem>O=Cc1cc(OC)c(O)cc1</chem>    | vanillin                | aromatic |
| 8103    | 111-27-3            | <chem>OCCCCC</chem>                | 1-hexanol               | aromatic |
| 5281167 | 928-96-1            | <chem>OCCC=CCC</chem>              | Z-3-hexenol             | other    |
| 31260   | 123-51-3            | <chem>OCC(C)C</chem>               | 3-methyl-1-butanol      | aromatic |
| 8723    | 137-32-6            | <chem>OCCC(C)C</chem>              | 2-methyl-1-butanol      | aromatic |
| 6276    | 71-41-0             | <chem>OCC(CC)C</chem>              | 1-pentanol              | aromatic |
| 5364919 | 1576-95-0/1576-96-1 | <chem>OCCCC</chem>                 | Z-2-penten-1-ol         | aromatic |
| 8109    | 111-35-3            | <chem>O(CCCO)CC</chem>             | 3-ethoxy-1-propanol     | aromatic |
| 7720    | 104-76-7            | <chem>OCC(CCCC)CC</chem>           | 2-ethyl-1-hexanol       | aromatic |
| 957     | 111-87-5            | <chem>OCCCCCCCC</chem>             | 1-octanol               | aromatic |
| 263     | 71-36-3             | <chem>OCCCC</chem>                 | 1-butanol               | aromatic |
| 11508   | 589-35-5            | <chem>OCCC(CC)C</chem>             | 3-methyl-1-pentanol     | aromatic |
| 7361    | 98-00-0             | <chem>OCc1ccccc1</chem>            | Furfuryl alcohol        | other    |
| 244     | 100-51-6            | <chem>OCc1ccccc1</chem>            | Benzyl alcohol          | aromatic |
| 17100   | 98-55-5             | <chem>OC(C)(C)C1CC=C(C)CC1</chem>  | terpineol               | aromatic |
| 8842    | 106-22-9            | <chem>OCCC(CCC=C(C)C)C</chem>      | citronellol             | aromatic |
| 7762    | 105-54-4            | <chem>O=C(OCC)CCC</chem>           | Ethyl butyrate          | aromatic |
| 7945    | 108-64-5            | <chem>O=C(OCC)CC(C)C</chem>        | Ethyl 3-methylbutyrate  | aromatic |
| 10882   | 539-82-2            | <chem>O=C(OCC)CCCC</chem>          | Ethyl pentanoate        | aromatic |
| 7344    | 97-64-3             | <chem>O=C(OCC)C(O)C</chem>         | Ethyl lactate           | aromatic |
| 7799    | 106-32-1            | <chem>O=C(OCC)CCCCC</chem>         | Ethyl octanoate         | aromatic |
| 62572   | 5405-41-4           | <chem>O=C(OCC)CC(O)C</chem>        | Ethyl 3-hydroxybutyrate | aromatic |
| 8048    | 110-38-3            | <chem>O=C(OCC)CCCCC</chem>         | Ethyl decanoate         | aromatic |
| 31249   | 123-25-1            | <chem>O=C(OCC)CCC(=O)OCC</chem>    | Diethyl succinate       | aromatic |
| 7590    | 101-97-3            | <chem>O=C(OCC)Cc1ccccc1</chem>     | Ethyl phenylacetate     | aromatic |
| 7654    | 103-45-7            | <chem>O=C(OCCc1ccccc1)C</chem>     | 2-phenylethyl acetate   | aromatic |
| 24197   | 2065419             | <chem>O=C(OCC)C(O)CC(=O)OCC</chem> | Diethyl malate          | other    |
| 70610   | 1070-34-4           | <chem>O=C(OCC)CCC(=O)O</chem>      | Monoethyl succinate     | aromatic |
| 10430   | 503-74-2/35915-22-1 | <chem>O=C(O)CC(C)C</chem>          | Isovaleric acid         | other    |

|          |                       |                                                                              |                               |            |
|----------|-----------------------|------------------------------------------------------------------------------|-------------------------------|------------|
| 8892     | 142-62-1              | <chem>O=C(O)CCCCC</chem>                                                     | Hexanoic acid                 | other      |
| 5365909  | 3142-72-1/16957-70-3  | <chem>O=C(O)C(=CCC)C</chem>                                                  | 2-methyl-2-Pentenoic acid     | aromatic   |
| 379      | 124-07-2              | <chem>O=C(O)CCCCCC</chem><br><chem>C</chem>                                  | Octanoic acid                 | other      |
| 2969     | 334-48-5              | <chem>O=C(O)CCCCCC</chem><br><chem>CCC</chem>                                | Decanoic acid                 | other      |
| 243      | 65-85-0               | <chem>O=C(O)c1ccccc1</chem>                                                  | Benzoic acid                  | other      |
| 7976     | 109-08-0              | <chem>Cc1nccnc1</chem>                                                       | 2-methylpyrazine              | other      |
| 14296    | 1124-11-4             | <chem>Cc1c(C)nc(C)c(C)n1</chem>                                              | 2,3,5,6-tetramethylpyrazine   | other      |
| 41285    | 55013-32-6/55013-32-6 | <chem>O=C1OC(CCCC)C(C)C1</chem>                                              | cis-oak lactone               | aromatic   |
| 7710     | 104-61-0              | <chem>O=C1OC(CCCCC)CC1</chem>                                                | nonalactone                   | aromatic   |
| 19309    | 3658-77-3             | <chem>O=C1C(O)=C(C)OC1C</chem>                                               | Furaneol                      | other      |
| 62465    | 2785-89-9/29760-89-2  | <chem>O(C)c1c(O)ccc(C)C)c1</chem>                                            | 4-ethylguaiaicol              | other      |
| 31242    | 123-07-9              | <chem>Oc1ccc(CC)cc1</chem>                                                   | 4-ethylphenol                 | other      |
| 7041     | 33512                 | <chem>O(C)c1c(O)c(OC)ccc1</chem>                                             | 2,6-dimethoxyphenol           | other      |
| 10393    | 501-94-0              | <chem>OCCc1ccc(O)cc1</chem>                                                  | tyrosol                       | aromatic   |
| 1549106  | 4501-31-9             | <chem>O=C(O)C=Cc1ccc(O)cc1</chem>                                            | cis-p-coumaric acid           | bitter     |
| 12304324 |                       | <chem>O=C1C(OC2C(O)C(O)C(O)C(CO)O2)=C(c2cc(O)c(O)cc2)Oc2c1c(O)cc(O)c2</chem> | quercetin-3-O-glucopyranoside | -D- bitter |
| 5280537  | 65646-26-6/66648-43-9 | <chem>O=C(NCCc1ccc(O)cc1)C=Cc1cc(OC)c(O)cc1</chem>                           | trans-N-feruloyltyramine      | bitter     |
| 23251204 |                       | <chem>O=C(C=Cc1ccc(O)cc1)c1c(OC)cc(O)c2c1OC(C)(C)C(O)C2</chem>               | xanthohumol L                 | bitter     |
| 12986068 |                       | <chem>O=C(C=Cc1ccc(O)cc1)c1c(OC)cc(O)c2c1OC(C(O)(C)C)C2</chem>               | xanthohumol I                 | bitter     |
| 5280343  | 117-39-5              | <chem>O=C1C(O)=C(c2cc(O)c(O)cc2)Oc2c1c(O)cc(O)c2</chem>                      | quercetin                     | bitter     |

|          |                      |                                                                       |                                    |        |
|----------|----------------------|-----------------------------------------------------------------------|------------------------------------|--------|
| 91064206 |                      | <chem>O(C)c1cc(O)c(CC=C(C)C)c(O)c1</chem>                             | 1-methoxy-4-prenylphloroglucinol   | bitter |
| 5319562  | 19367-38-5/3943-97-3 | <chem>O=C(OC)C=Cc1cc(O)cc1</chem>                                     | trans-p-coumaric acid methyl ester | bitter |
| 12719326 |                      | <chem>O=C(OCC)C=Cc1ccc(O)cc1</chem>                                   | cis-p-coumaric acid ethyl ester    | bitter |
| 676946   | 394257               | <chem>O=C(OCC)C=Cc1ccc(O)cc1</chem>                                   | trans-p-coumaric acid ethyl ester  | bitter |
| 513197   |                      | <chem>O(C)c1c2C(=O)C(C3ccc(O)cc3)Oc2c(CC=C(C)C)c(O)c1</chem>          | isoxanthohumol                     | bitter |
| 9799506  | 189308-10-9          | <chem>O=C(C=Cc1ccc(O)cc1)c1c(O)c2c(OC(C)(C)C(O)C2)c1OC</chem>         | xanthohumol B                      | bitter |
| 10317069 | 274675-25-1          | <chem>O=C(C=Cc1ccc(O)cc1)c1c(O)c(CC(O)C(=C)C)c(O)cc1OC</chem>         | xanthohumol D                      | bitter |
| 6443339  | 115063-39-3          | <chem>O=C(C=Cc1ccc(O)cc1)c1c(O)c(CC=C(C)C)c(O)cc1OC</chem>            | desmethylxanthohumol               | bitter |
| 1.22E+08 |                      | <chem>O=C(C=Cc1ccc(O)cc1)c1c(OC)c(CC=C(C)C)c(O)c2c1OC(C)(C)CC2</chem> | dihydroxanthohumol F               | bitter |
| 1.22E+08 |                      | <chem>O=C(C=Cc1ccc(O)cc1)c1c(O)c(CCC(OC)(C)C)c(O)cc1OC</chem>         | xanthohumol M                      | bitter |
| 1.22E+08 |                      | <chem>O(C(Cc1c(O)cc(OC)c2C(=O)CC(c3ccc(O)cc3)Oc12)(C)C</chem>         | isoxanthohumol M                   | bitter |
| 155094   | 68236-13-5           | <chem>O=C1c2c(O)c(CC=C(C)C)c(O)cc2OC(c2ccc(O)cc2)C1</chem>            | 6-prenylnaringenin                 | bitter |
| 480764   | 53846-50-7           | <chem>O=C1c2c(O)cc(O)c(CC=C(C)C)c2OC(c2ccc(O)cc2)C1</chem>            | 8-prenylnaringenin                 | bitter |
| 639665   | 6754-58-1            | <chem>O=C(C=Cc1ccc(O)cc1)c1c(O)c(CC=C(C)C)c(O)cc1OC</chem>            | xanthohumol                        | bitter |

|          |                    |                                                                                   |                         |          |
|----------|--------------------|-----------------------------------------------------------------------------------|-------------------------|----------|
| 11046840 |                    | <chem>O=C(C=Cc1ccc(O)cc1)c1c(O)c2c(OC(C)(C)CC2)cc1OC</chem>                       | dihydroxanthohumol C    | bitter   |
| 10338075 | 189299-05-6        | <chem>O=C(C=Cc1ccc(O)cc1)c1c(O)c2c(OC(C)(C)C=C2)cc1OC</chem>                      | xanthohumol C           | bitter   |
| 1.22E+08 |                    | <chem>O(C)C=1C(=C(O)C=Cc2ccc(O)cc2)C(=O)C(CC=C(C)C)(CC=C(C)C)C(=O)C=1</chem>      | hydroxytunicatachalcone | bitter   |
| 23250008 | 189299-04-5        | <chem>O=C(C=Cc1ccc(O)cc1)c1c(OC)c(CC=C(C)C)c(O)c(CC=C(C)C)c1O</chem>              | prenylxanthohumol       | bitter   |
| 1.22E+08 |                    | <chem>O=C1C(CC=C(C)C)(CC=C(C)C)C(O)=C(CC=C(C)C)C=2OC(c3ccc(O)c3)CC(=O)C1=2</chem> | isoxantholupon          | bitter   |
| 1.22E+08 |                    | <chem>O=C(C=Cc1ccc(O)cc1)c1c(O)c(CCC(=C)C)c(O)cc1OC</chem>                        | xanthohumol N           | bitter   |
| 1.22E+08 |                    | <chem>O=C(C=Cc1ccc(O)cc1)c1c(O)c(CCC(OCC)(C)C)c(O)c1OC</chem>                     | xanthohumol P           | bitter   |
| 1.22E+08 |                    | <chem>O(C(CCCc1c(O)cc(OC)c2C(=O)CC(c3ccc(O)cc3)Oc12)(C)C)CC</chem>                | isoxanthohumol P        | bitter   |
| 7797     | 106-30-9           | <chem>O=C(OCC)CCCCC</chem>                                                        | Ethyl heptanoate        | aromatic |
| 7165     | 93-89-0            | <chem>O=C(OCC)c1ccccc1</chem>                                                     | Ethyl benzoate          | aromatic |
| 5365910  | 1189-09-9          | <chem>O=C(OC)C=C(CCC=C(C)C)C</chem>                                               | Methyl geranate         | aromatic |
| 7800     | 106-33-2           | <chem>O=C(OCC)CCCCCCCC</chem>                                                     | Ethyl laurate           | aromatic |
| 7501     | 100-42-5           | <chem>C(=C)c1ccccc1</chem>                                                        | Styrene                 | aromatic |
| 10722    | 529-20-4/1334-78-7 | <chem>O=Cc1c(C)cccc1</chem>                                                       | o-Tolualdehyde          | aromatic |

|         |                                 |                                               |                    |          |
|---------|---------------------------------|-----------------------------------------------|--------------------|----------|
| 5284503 | 544-12-7/928-97-2               | <chem>OCCC=CCC</chem>                         | 3-Hexen-1-ol       | other    |
| 5281520 | 6753-98-6                       | <chem>CC1(C)C=CCC(C)=CCCC(C)=CC1</chem>       | Humulene           | aromatic |
| 14896   | 25719-60-2                      | <chem>C=C1C2C(C)(C)C(C2)CC1</chem>            | Pinene             | other    |
| 240     | 100-52-7                        | <chem>O=Cc1ccccc1</chem>                      | Benzaldehyde       | other    |
| 8857    | 141-78-6                        | <chem>O=C(OCC)C</chem>                        | Ethyl acetate      | aromatic |
| 1031    | 8/142583-61-7/62309-51-7        | <chem>OCCC</chem>                             | n-Propanol         | aromatic |
| 5283324 | 2363-89-5                       | <chem>O=CC=CCCCC</chem>                       | E-2-Octenal        | other    |
| 643731  | 557-48-2/26370-28-5             | <chem>O=CC=CCCC=C</chem><br><chem>CC</chem>   | E,Z-2,6-Nonadienal | other    |
| 5283335 | 2463-53-8/18829-56-6            | <chem>O=CC=CCCCC</chem><br><chem>C</chem>     | E-2-Nonenal        | other    |
| 5283349 | 2363-88-4/25152-84-5/30551-18-9 | <chem>O=CC=CC=CCC</chem><br><chem>CCC</chem>  | E,E-2,4-Decadienal | aromatic |
| 650     | 431-03-8                        | <chem>O=C(C(=O)C)C</chem>                     | Diacetyl           | other    |
| 1068    | 75-18-3                         | <chem>S(C)C</chem>                            | Dimethyl sulfide   | sulfury  |
| 7997    | 109-60-4                        | <chem>O=C(OCCC)C</chem>                       | Propyl acetate     | aromatic |
| 8038    | 110-19-0                        | <chem>O=C(OCC(C)C)C</chem>                    | Isobutyl acetate   | aromatic |
| 12348   | 628-63-7                        | <chem>O=C(OCCCC)C</chem>                      | Amyl acetate       | aromatic |
| 6184    | 66-25-1                         | <chem>O=CCCCCC</chem>                         | Hexanal            | other    |
| 11552   | 590-86-3/26140-47-6             | <chem>O=CCC(C)C</chem>                        | 3-Methyl butanal   | other    |
| 527     | 123-38-6                        | <chem>O=CCC</chem>                            | Propanal           | aromatic |
| 7362    | 98-01-1/8030-97-5               | <chem>O=Cc1occc1</chem>                       | Furfural           | other    |
| 7284    | 96-17-3                         | <chem>O=CC(CC)C</chem>                        | 2-Methylbutanal    | other    |
| 6561    | 78-84-2                         | <chem>O=CC(C)C</chem>                         | 2-Methylpropanal   | aromatic |
| 998     | 122-78-1                        | <chem>O=CCc1ccccc1</chem>                     | Phenylacetaldehyde | aromatic |
| 31289   | 124-19-6                        | <chem>O=CCCCCCCC</chem>                       | Nonanal            | aromatic |
| 61743   | 14436-32-9                      | <chem>O=C(O)CCCCC</chem><br><chem>CC=C</chem> | 9-Decenoic acid    | other    |
| 180     | 67-64-1                         | <chem>O=C(C)C</chem>                          | Acetone            | aromatic |
| 179     | 513-86-0                        | <chem>O=C(C(O)C)C</chem>                      | Acetoin            | other    |
| 311     | 77-92-9                         | <chem>O=C(O)C(O)(CC(=O)O)CC(=O)O</chem>       | Citric acid        | other    |
| 612     | 50-21-5                         | <chem>O=C(O)C(O)C</chem>                      | Lactic acid        | other    |
| 7991    | 109-52-4                        | <chem>O=C(O)CCCC</chem>                       | Pentanoic acid     | other    |
| 1110    | 110-15-6                        | <chem>O=C(O)CCC(=O)O</chem>                   | Succinic acid      | other    |

|          |                      |                                                                                        |                     |        |
|----------|----------------------|----------------------------------------------------------------------------------------|---------------------|--------|
| 875      | 526-83-0             | <chem>O=C(O)C(O)C(O)C(=O)O</chem>                                                      | Tartaric acid       | other  |
| 44201359 |                      | <chem>O=C(C(C)C)C1=C(O)C(O)(C(=O)CC=C(C)C)C1=O</chem>                                  | trans-isocohumulone | bitter |
| 58473841 | 68127-23-1           | <chem>O=C(C(C)C)C1=C(O)C(O)(C(=O)CC=C(C)C)C1=O</chem>                                  | cis-isocohumulone   | bitter |
| 11175902 | 467-72-1             | <chem>O=C(CC(C)C)C1=C(O)C(O)(C(=O)C=C(C)C)C1=O</chem>                                  | trans-isohumulone   | bitter |
| 21594782 | 1534-03-8            | <chem>O=C(CC(C)C)C1=C(O)C(O)(C(=O)C=C(C)C)C1=O</chem>                                  | cis-isohumulone     | bitter |
| 91753956 |                      | <chem>[Si](OC1=C(C(=O)C(CC)C)C(=O)C(CC=C(C)C)C1(O[Si](C)(C)C)C(=O)CC=C(C)C)(C)C</chem> | trans-isoadhumulone | bitter |
| 6431604  |                      | <chem>[Si](OC1=C(C(=O)C(CC)C)C(=O)C(CC=C(C)C)C1(O[Si](C)(C)C)CC=C(C)C)(C)C</chem>      | cis-isoadhumulone   | bitter |
| 12314502 |                      | <chem>O=C(CC)C=1C(=O)C(O)(CC=C(C)C)C(O)=C(CC=C(C)C)C=1O</chem>                         | posthumulone        | bitter |
| 196915   | 511-25-1/142628-20-4 | <chem>O=C(C(C)C)C=1C(=O)C(O)(CC=C(C)C)C(O)=C(CC=C(C)C)C=1O</chem>                      | cohumulone          | bitter |
| 442911   | 26472-41-3           | <chem>O=C(CC(C)C)C=1C(=O)C(O)(CC=C(C)C)C(O)=C(CC=C(C)C)C=1O</chem>                     | humulone            | bitter |
| 193681   | 31769-65-0           | <chem>O=C(C(CC)C)C=1C(=O)C(O)(CC=C(C)C)C(O)=C(CC</chem>                                | adhumulone          | bitter |

|          |            |                                                                                                                                                                                 |               |        |
|----------|------------|---------------------------------------------------------------------------------------------------------------------------------------------------------------------------------|---------------|--------|
| 90473758 |            | <chem>=C(C)C=C1O</chem><br><chem>O=C(CCC(C)C)C</chem><br><chem>=1C(=O)C(O)(CC</chem><br><chem>=C(C)C)C(O)=C(</chem><br><chem>CC=C(C)C)C=1O</chem><br><chem>O=C(CCCCC)C=1</chem> | prehumulone   | bitter |
| 1.02E+08 |            | <chem>C(=O)C(O)(CC=C</chem><br><chem>(C)C)C(O)=C(CC</chem><br><chem>=C(C)C)C=1O</chem><br><chem>O=C(CC)C=1C(=</chem><br><chem>O)C(CC=C(C)C)(</chem>                             | adprehumulone | bitter |
| 1.02E+08 |            | <chem>CC=C(C)C)C(O)=</chem><br><chem>C(CC=C(C)C)C=1</chem><br><chem>O</chem><br><chem>O=C(C(C)C)C=1C</chem><br><chem>(=O)C(CC=C(C)C</chem>                                      | postlupulone  | bitter |
| 373677   | 468-27-9   | <chem>)(CC=C(C)C)C(O)</chem><br><chem>=C(CC=C(C)C)C=</chem><br><chem>1O</chem><br><chem>O=C(CC(C)C)C=1</chem><br><chem>C(=O)C(CC=C(C)</chem>                                    | colupulone    | bitter |
| 68051    | 468-28-0   | <chem>C)(CC=C(C)C)C(</chem><br><chem>O)=C(CC=C(C)C)</chem><br><chem>C=1O</chem><br><chem>O=C(C(CC)C)C=1</chem><br><chem>C(=O)C(CC=C(C)</chem>                                   | lupulone      | bitter |
| 9909740  | 28374-71-2 | <chem>C)(CC=C(C)C)C(</chem><br><chem>O)=C(CC=C(C)C)</chem><br><chem>C=1O</chem><br><chem>O=C(CCC(C)C)C</chem><br><chem>=1C(=O)C(CC=C(</chem>                                    | adlupulone    | bitter |
| 1.02E+08 |            | <chem>C)C)(CC=C(C)C)</chem><br><chem>C(O)=C(CC=C(C)</chem><br><chem>C)C=1O</chem><br><chem>O=C(CC(CC)C)C</chem><br><chem>=1C(=O)C(CC=C(</chem>                                  | prelupulone   | bitter |
| 1.01E+08 |            | <chem>C)C)(CC=C(C)C)</chem><br><chem>C(O)=C(CC=C(C)</chem><br><chem>C)C=1O</chem><br><chem>O=C(CC=C(C)C)</chem><br><chem>C1(O)C(=O)C(C(=</chem>                                 | adprelupulone | bitter |
| 534962   | 26110-47-4 | <chem>O)CC(C)C)=C(O)</chem><br><chem>C1(O)CC=C(C)C</chem><br><chem>O=C(C(C)C)C1=C</chem>                                                                                        | humulinone    | bitter |
| 1.02E+08 |            | <chem>O=C(C(C)C)C1=C</chem>                                                                                                                                                     | tricyclohumol | bitter |



|          |                                                                                                                                                        |                      |        |
|----------|--------------------------------------------------------------------------------------------------------------------------------------------------------|----------------------|--------|
| 1.02E+08 | <chem>(O)C2(O)C3(O)C(C(C)(C)C(C(O)(C)C)C3)CC2C1=O</chem><br><chem>O=C(CC(C)C)C1=C(O)C2(O)C3(O)C(C(C)(C)C(C(O)(C)C)C3)CC2C1=O</chem>                    | tricyclohumol        | bitter |
| 1.02E+08 | <chem>O=C(C(C)C)C1=C(O)C2(O)C3(O)C(C(C)(C)C(C(=C)C)C3)CC2C1=O</chem><br><chem>O=C(CC(C)C)C1=C(O)C2(O)C3(O)C(C(C)(C)C(C(=C)C)C3)CC2C1=O</chem>          | tricyclohumene       | bitter |
| 1.02E+08 | <chem>O=C(C(C)C)C1=C(O)C2(O)C3(O)C(C(C)(C)C(C(=C)C)C3)CC2C1=O</chem><br><chem>O=C(C(C)C)C1=C(O)C2(O)C3(O)C(C(C)(C)C(C(=C)C)C3)CC2C1=O</chem>           | tricyclohumene       | bitter |
| 1.02E+08 | <chem>O=C(CC(C)C)C1=C(O)C2(O)C3(O)C(C(C)(C)C(=C(C)C)C3)CC2C1=O</chem><br><chem>O=C(CC(C)C)C1=C(O)C2(O)C3(O)C(C(C)(C)C(=C(C)C)C3)CC2C1=O</chem>         | isotricyclohumene    | bitter |
| 1.02E+08 | <chem>O=C(CC(C)C)C1=C(O)C2(O)C3(O)C(C(C)(C)C(=C(C)C)C3)CC2C1=O</chem><br><chem>O=C1C2=C(C(C)C)C)OC(C)(C)C3C2(O)C2(O)C(O)(C(C(O)(C)C)CC12)C3</chem>     | isotricyclohumene    | bitter |
| 1.02E+08 | <chem>O=C1C2=C(C(C)C)C)OC(C)(C)C3C2(O)C2(O)C(O)(C(C(O)(C)C)CC12)C3</chem><br><chem>O=C1C2=C(C(C)C)C)OC(C)(C)C3C2(O)C2(O)C(O)(C(C(O)(C)C)CC12)C3</chem> | tetracyclohumol      | bitter |
| 1.02E+08 | <chem>O=C1C2=C(C(C)C)C)OC(C)(C)C3C2(O)C2(O)C(O)(C(C(O)(C)C)CC12)C3</chem><br><chem>O=C1C2=C(C(C)C)C)OC(C)(C)C3C2(O)C2(O)C(O)(C(C(O)(C)C)CC12)C3</chem> | tetracyclohumol      | bitter |
| 1.02E+08 | <chem>O=C1C2=C(C(C)C)C)OC(C)(C)C3C2(O)C2(O)C(O)(C(C(O)(C)C)CC12)C3</chem><br><chem>O=C1C2=C(C(C)C)C)OC(C)(C)C3C2(O)C2(O)C(O)(C(C(O)(C)C)CC12)C3</chem> | epitetracyclohumol   | bitter |
| 1.02E+08 | <chem>O=C1C2=C(C(C)C)C)OC(C)(C)C3C2(O)C2(O)C(O)(C(C(O)(C)C)CC12)C3</chem><br><chem>O=C1C2=C(C(C)C)C)OC(C)(C)C3C2(O)C2(O)C(O)(C(C(O)(C)C)CC12)C3</chem> | epitetracyclohumol   | bitter |
| 530272   | <chem>[Si](OC=1C(C(=O)C(C)C)=C(O[Si](</chem>                                                                                                           | cis-cohumulinic acid | bitter |

|          |                    |                                                                                       |                          |          |
|----------|--------------------|---------------------------------------------------------------------------------------|--------------------------|----------|
| 15558357 |                    | <chem>C(C)C(C)C(O[Si](C)(C)C)C=1CC=C(C)C(C)(C)C</chem>                                | trans-humulonic acid     | bitter   |
|          |                    | <chem>O=C(C(CC)C)C1C(=O)C(=O)C(CC=C(C)C)C1=O</chem>                                   |                          |          |
| 530273   |                    | <chem>[Si](OC=1C(C(=O)CC(C)C)=C(O[Si](C)(C)C)C(O[Si](C)(C)C)C=1CC=C(C)C(C)(C)C</chem> | cis-humulonic acid       | bitter   |
| 12310637 | 1891-42-5          | <chem>O=C1C(CC=C(C)C)C(C)(CC=C(C)C)C(=O)C(O)=C1O</chem>                               | hulupinic acid           | bitter   |
| 643820   | 106-25-2           | <chem>OCC=C(CCC=C(C)C)C</chem>                                                        | Nerol                    | aromatic |
| 638011   | 141-27-5/5392-40-5 | <chem>O=CC=C(CCC=C(C)C)C</chem>                                                       | Geranial                 | aromatic |
| 643779   | 106-26-3           | <chem>O=CC=C(CCC=C(C)C)C</chem>                                                       | Neral                    | aromatic |
| 5275520  | 459-80-3/4698-08-2 | <chem>O=C(O)C=C(CCC=C(C)C)C</chem>                                                    | Geranic Acid             | aromatic |
| 7462     |                    | <chem>C(C)(C)C1=CC=C(C)CC1</chem>                                                     | Terpinene                | aromatic |
| 7461     | 99-85-4            | <chem>C(C)(C)C1=CCC(C)=CC1</chem>                                                     | Terpinene                | aromatic |
| 440917   | 5989-27-5          | <chem>C(=C)(C)C1CC=C(C)CC1</chem>                                                     | (+)-limonene             | aromatic |
| 11463    | 586-62-9           | <chem>C(C)(C)=C1CC=C(C)CC1</chem>                                                     | Terpinolene              | aromatic |
| 31253    | 123-35-3           | <chem>C(C=C)(=C)CCC=C(C)C</chem>                                                      | Myrcene                  | aromatic |
| 8785     | 140-11-4           | <chem>O=C(OCc1ccccc1)C</chem>                                                         | Benzyl acetate           | aromatic |
| 369312   | 18457-55-1         | <chem>OCC1=CCC(C(=C)C)CC1</chem>                                                      | (S)-(-)-perillyl alcohol | aromatic |
| 445070   | 106-28-5/4602-84-0 | <chem>OCC=C(CCC=C(C)C)C</chem>                                                        | farnesol                 | aromatic |
| 11196    | 26370-28-5         | <chem>O=CC=CCCC=C</chem>                                                              | 2,6-Nonadienal           | aromatic |
| 7150     | 93-58-3            | <chem>O=C(OC)c1ccccc1</chem>                                                          | Methyl benzoate          | aromatic |
| 65040    | 554-01-8           | <chem>O=C1N=CC(C)=C(N)N1</chem>                                                       | 5-Methylcytosine         | aromatic |

|        |                    |                                                                                                      |                                   |          |
|--------|--------------------|------------------------------------------------------------------------------------------------------|-----------------------------------|----------|
| 6175   | 65-46-3            | <chem>O=C1N(C2C(O)C(O)C(CO)O2)C=C(C(N)=N1)</chem>                                                    | Cytidine                          | aromatic |
| 6180   | 1115-47-5          | <chem>S(CCC(NC(=O)C)C(=O)O)C</chem>                                                                  | n-Acetyl-methionine               | sulfury  |
| 5789   | 50-89-5            | <chem>O=C1N(C2OC(C)C(O)C2)C=C(C)C(=O)N1</chem>                                                       | Thymidine                         | aromatic |
| 1130   | 70-16-6/59-43-8    | <chem>OCCc1c(C)[n+](C)c2c(N)nc(C)nc2cs1</chem>                                                       | Thiamine                          | bitter   |
| 10972  | 543-24-8           | <chem>O=C(O)CNC(=O)C</chem>                                                                          | Acetylglycine                     | aromatic |
| 239    | 107-95-9           | <chem>O=C(O)CCN</chem>                                                                               | Alanine                           | aromatic |
| 16617  | 2198-61-0          | <chem>O=C(OCCCC(C)C)CCCC</chem>                                                                      | Isopentyl hexanoate               | aromatic |
| 8050   | 110-42-9           | <chem>O=C(OC)CCCCCCCC</chem>                                                                         | Methyl decanoate/methyl caprate   | aromatic |
| 31284  | 124-10-7           | <chem>O=C(OC)CCCCCCCCC</chem>                                                                        | Methyl tetradecanoate             | aromatic |
| 562667 | 72109-82-1         | <chem>O=C(OCCCCCCC)Cc1ccccc1</chem>                                                                  | Nonyl phenylacetate               | aromatic |
| 550967 | 562-13-0           | <chem>O=C1C(C)(C)C(=O)CCC1</chem>                                                                    | 2,2-Dimethyl-1,3-cyclohexanedione | other    |
| 75725  | 2566-34-9          | <chem>O=C(O)C(NC)(C)C</chem>                                                                         | n-Methyl-a-aminoisobutyric acid   | aromatic |
| 643798 | 498-23-7/7407-59-2 | <chem>O=C(O)C(=CC(=O)O)C</chem>                                                                      | Citraconic acid                   | other    |
| 162350 | 29702-25-8         | <chem>O=C1c2c(O)c(c(O)cc2OC(c2ccc(O)c2)=C1)C1C(O)C(O)C(O)C(CO)O1</chem>                              | Apigenin-6-C-glucoside            | aromatic |
| 439312 |                    | <chem>OCC1(O)C(O)C(O)C(O)C(O)CO1</chem>                                                              | Tagatose                          | aromatic |
| 439531 | 470-55-3           | <chem>O(CC1C(O)C(O)C(O)C(OC2(CO)C(O)C(O)C(CO)O2)O1)C1C(O)C(O)C(O)C(COC2C(O)C(O)C(O)C(CO)O2)O1</chem> | Stachyose                         | aromatic |
| 5988   | 57-50-1            | <chem>O(C1(CO)C(O)C(O)C(CO)O1)C1C(O)C(O)C(O)C(CO)O1</chem>                                           | Sucrose                           | aromatic |

|          |                     |                                                           |                                  |          |
|----------|---------------------|-----------------------------------------------------------|----------------------------------|----------|
| 7427     | 99-20-7             | <chem>O=C1C(O)C(O)C(O)C(CO)O1C1C(O)C(O)C(O)C(CO)O1</chem> | Trehalose                        | aromatic |
| 5460935  | 547-25-1            | <chem>O=C(C(OC1C(O)C(O)C(O)C(CO)O1)C(O)C(O)CO)C</chem>    | Turanose                         | aromatic |
| 564550   | 7779-23-9           | <chem>O=C(OC(C=C)(C)C)C</chem>                            | Linalyl hexanoate                | aromatic |
| 538753   |                     | <chem>O=C1C(N)=NON1</chem>                                | Furazan-3-ol, 4-amino            | aromatic |
| 637511   | 104-55-2/14371-10-9 | <chem>O=CC=Cc1ccccc1</chem>                               | Cinnamaldehyde                   | aromatic |
| 237332   | 67-47-0             | <chem>O=Cc1oc(CO)cc1</chem>                               | Hydroxymethylfurfural            | other    |
| 6088     | 61-49-4             | <chem>N(CCc1c2c([nH]c1)cccc2)C</chem>                     | N-Methyltryptamine               | other    |
| 12489    | 636-41-9            | <chem>Cc1[nH]ccc1</chem>                                  | 2-Methylpyrrole                  | sulfury  |
| 7963     | 108-89-4            | <chem>Cc1ccncc1</chem>                                    | 4-Methylpyridine                 | other    |
| 9061     | 154-02-9            | <chem>OCCc1c2c([nH]c1)ccc(O)c2</chem>                     | 5-Hydroxytryptophol              | sulfury  |
| 1712448  | 2001-93-6           | <chem>S=C1NC(=S)C=C</chem>                                | Dithiouracil                     | sulfury  |
| 14284    | 1122-58-3           | <chem>N(C)(C)c1ccncc1</chem>                              | 4-Dimethylaminopyridine          | sulfury  |
| 12709    | 687-48-9            | <chem>O=C(OCC)N(C)C</chem>                                | Ethyl dimethylcarbamate          | sulfury  |
| 6262     | 70-26-8             | <chem>O=C(O)C(N)CCC</chem>                                | Ornithine                        | sulfury  |
| 7405     | 98-79-3             | <chem>O=C(O)C1NC(=O)CC1</chem>                            | Pyroglutamic acid                | aromatic |
| 91692231 |                     | <chem>O=C(O)C(N)C(=O)C1=CC=CC=C1</chem>                   | Sarcosine, N-(3-phenylpropionyl) | aromatic |
| 967      | 65-86-1             | <chem>O=C(O)C=1NC(=O)NC(=O)C=1</chem>                     | Orotic acid                      | sulfury  |
| 938      | 59-67-6             | <chem>O=C(O)c1cnccc1</chem>                               | Niacin                           | other    |
| 6322     | 74-79-3             | <chem>O=C(O)C(N)CCC</chem>                                | Arginine                         | aromatic |
| 6267     | 70-47-3             | <chem>N=C(N)N</chem>                                      | Asparagine                       | aromatic |
| 83814    | 576-19-2            | <chem>O=C(O)C(N)CCC</chem>                                | Biocytin                         | aromatic |
|          |                     | <chem>CNC(=O)CCCC</chem>                                  |                                  |          |
|          |                     | <chem>1SCC2NC(=O)NC</chem>                                |                                  |          |

|          |                    |                                                |                                       |          |
|----------|--------------------|------------------------------------------------|---------------------------------------|----------|
| 6306     | 73-32-5            | <chem>O=C(O)C(N)C(CC)C</chem>                  | Isoleucine                            | sulfury  |
| 5962     | 56-87-1            | <chem>O=C(O)C(N)CCC(N)C</chem>                 | Lysine                                | other    |
| 6137     | 63-68-3            | <chem>S(CCC(N)C(=O)O)C</chem>                  | Methionine                            | other    |
| 6305     | 73-22-3            | <chem>O=C(O)C(N)Cc1c2c([nH]c1)cccc2</chem>     | Tryptophan                            | sulfury  |
| 6613     | 79-83-4            | <chem>O=C(NCCC(=O)O)C(O)C(CO)(C)C</chem>       | Pantothenic acid                      | sulfury  |
| 21889526 |                    | <chem>O=C([O-])C(N)CC</chem>                   | Aminobutyrate                         | other    |
| 978      | 150-13-0           | <chem>O=C(O)c1ccc(N)cc1</chem>                 | para-aminobenzoic acid                | sulfury  |
| 121709   | 30434-54-9         | <chem>O=C(OCC(C)C)C=C(C)C</chem>               | Isobutyl 3-methyl-2-butenolate        | sulfury  |
| 79582    | 1300784            | <chem>O=C(OCC(C)C)CCCCC</chem>                 | Isobutyl caprylate                    | other    |
| 560572   | 51534-66-8         | <chem>S(C(C(=O)OC)CC)C</chem>                  | Methyl 2-(methylthio)butyrate         | sulfury  |
| 65425    | 53053-51-3         | <chem>S(CCCC(=O)OC)C</chem>                    | Methyl-4-(methylthio)butyrate         | sulfury  |
| 20831779 | 827024-53-3        | <chem>S(C(=O)C(OC(=O)CC)C)C</chem>             | Methylthio-2-(propanoyloxy)propanoate | sulfury  |
| 573623   |                    | <chem>O=C(CCCCCCCC)CCCCCCCCC)c1occc1</chem>    | Furan, 2-nonadecanoyl                 | other    |
| 76662    | 3194-15-8          | <chem>O=C(CC)c1occc1</chem>                    | 2-Propionylfuran                      | other    |
| 11427    | 583-91-5           | <chem>S(CCC(O)C(=O)O)C</chem>                  | 2-Hydroxy-4-(methylthio)butyric acid  | sulfury  |
| 444972   | 110-17-8           | <chem>O=C(O)C=CC(=O)O</chem>                   | Fumaric acid                          | sulfury  |
| 533935   | 55021-77-7         | <chem>S(CCCCN)C</chem>                         | 4-(methylthio)-1-butanamine           | sulfury  |
| 7222     | 95-16-9            | <chem>s1c2c(nc1)cccc2</chem>                   | Benzothiazole                         | sulfury  |
| 16592    | 2179-60-4          | <chem>S(SC)CCC</chem>                          | Methyl propyl disulfide               | sulfury  |
| 96757    | 1999-34-4/554-94-9 | <chem>S(CCC(NC(=O)C)N)C(=O)O</chem>            | Glycyl-methionine                     | aromatic |
| 435728   |                    | <chem>O=C(O)C(NC(=O)C(N)C(CC)C)Cc1cccc1</chem> | Isoleucyl-phenylalanine               | sulfury  |
| 151004   | 2418-74-8          | <chem>O=C(O)C(NC(=O)C1NCCC1)CCCN=C(N)N</chem>  | Prolyl-arginine                       | sulfury  |
| 18218234 |                    | <chem>SCC(NC(=O)C1NCCC1)C(=O)O</chem>          | Prolyl-cysteine                       | sulfury  |

|          |                           |                                                           |                           |          |
|----------|---------------------------|-----------------------------------------------------------|---------------------------|----------|
| 19762195 |                           | SCC(NC(=O)C(N)<br>Cc1c2c([nH]c1)cc<br>cc2)C(=O)O          | Tryptophyl-cysteine       | sulfury  |
| 8468     | 121-34-6                  | O=C(O)c1cc(OC)c<br>(O)cc1                                 | Vanillic acid             | sulfury  |
| 439176   | 2457-80-9                 | S(CC1C(O)C(O)C<br>(n2c3ncnc(N)c3nc<br>2)O1)C              | 5-Methylthioadenosine     | sulfury  |
| 190      | 73-24-5                   | Nc1ncnc2nc[nH]c<br>12                                     | Adenine                   | other    |
| 60961    | 58-61-7                   | OCC1C(O)C(O)C(<br>n2c3ncnc(N)c3nc2<br>)O1                 | Adenosine                 | sulfury  |
| 1.35E+08 | 58-63-9                   | O=C1NC=Nc2n(C<br>3C(O)C(O)C(CO)<br>O3)cnc12               | Inosine                   | aromatic |
| 1044     | 120-73-0                  | [nH]1c2c(nc1)ncn<br>c2                                    | Purine                    | sulfury  |
| 439193   | 499-40-1                  | O(CC1C(O)C(O)C<br>(O)C(O)O1)C1C(<br>O)C(O)C(O)C(CO<br>)O1 | Isomaltose                | aromatic |
| 5282108  | 127-41-3                  | O=C(C=CC1C(C)<br>=CCCC1(C)C)C                             | Ionone                    | aromatic |
| 25913    | 13360-61-<br>7/27251-68-9 | C(=C)CCCCCCC<br>CCCCC                                     | 1-Pentadecene             | aromatic |
| 124886   | 70-18-8                   | SCC(NC(=O)CCC<br>(N)C(=O)O)C(=O)<br>NCC(=O)O              | Glutathione               | aromatic |
| 74839    | 2018-61-<br>3/2901-75-9   | O=C(O)C(NC(=O)<br>C)Cc1ccccc1                             | n-Acetyl-phenylalanine    | aromatic |
| 22880    | 6384-92-5                 | O=C(O)C(NC)CC(<br>=O)O                                    | n-methyl-D-aspartate      | other    |
| 44423663 |                           | O=C(O)C(NC(=O)<br>CCCCCCCC=CC<br>CCCCCCC)C                | n-Oleoyl-alanine          | aromatic |
| 99289    | 28954-12-3                | O=C(O)C(N)C(O)<br>C                                       | Allothreonine             | aromatic |
| 6287     | 72-18-4                   | O=C(O)C(N)C(C)<br>C                                       | Valine                    | aromatic |
| 4649     | 65-49-6                   | O=C(O)c1c(O)cc(<br>N)cc1                                  | 4-Aminosalicylic acid     | aromatic |
| 409323   | 5782-80-9                 | O=C(O)C(N)CCC<br>CCCCCCCCCCC                              | 2-Amino-octadecanoic acid | aromatic |

|          |                        |                                                                                                  |                      |          |
|----------|------------------------|--------------------------------------------------------------------------------------------------|----------------------|----------|
| 7012     | 90-27-7                | CC<br>O=C(O)C(CC)c1c<br>cccc1                                                                    | 2-Phenylbutyric acid | aromatic |
| 44256507 |                        | O=C(O)CCCCC<br>CCCC=CCC1C(C<br>CCCC)O1                                                           | Alchornoic acid      | aromatic |
| 637517   | 112-79-<br>8/2027-47-6 | O=C(O)CCCCC<br>CC=CCCCCCCC<br>C                                                                  | Elaidic acid         | aromatic |
| 86289532 | 103597-60-0            | P(=O)(OCC(OC(=<br>O)CCCC=CCC=C<br>CC=CCC=CCCC<br>CC)COC=CCCCC<br>CCCCCCCCCCCC<br>C)(OCC[N+])[O-] | GPE (p-18:0/20:4)    | aromatic |
| 8094     | 111-14-8               | O=C(O)CCCCC<br>P(=O)(OCC(O)CO<br>C(=O)CCCCCCC                                                    | Heptanoic acid       | other    |
| 11005824 |                        | C=CCC=CCCCC<br>C)(OCC[N+](C)(C<br>)C)[O-]                                                        | LysoPC (18:2)        | aromatic |
| 24779469 |                        | P(=O)(OCC(O)CO<br>C(=O)CCCCCCC<br>C=CCC=CCC=CC<br>C)(OCC[N+](C)(C<br>)C)[O-]                     | LysoPC (18:3)        | aromatic |
| 5281120  | 506-37-6               | O=C(O)CCCCC<br>CCCCCCCC=CC<br>CCCCCCC                                                            | Nervonic acid        | aromatic |
| 445639   | 112-80-1               | O=C(O)CCCCC<br>CC=CCCCCCCC<br>C                                                                  | Oleic acid           | other    |
| 24779471 |                        | P(=O)(OC[C@H](<br>O)COC(=O)CCCC<br>CCC/C=C/C=C/C/<br>=C/C=C/CC)(OCC<br>[N+](C)(C)C)[O-]          | PC (18:4)            | aromatic |
| 49859598 |                        | P(=O)(OCC(OC(=<br>O)CCCCCCCCCCC<br>CCCC)COC(=O)<br>CCCCCCCCCCCC<br>CCCC)(OCC(O)C<br>OP(=O)(O)O)O | PGP (32:0)           | aromatic |
| 70       |                        | O=C(O)C(=O)CC(                                                                                   | Ketoisocaproate      | aromatic |

|          |                         |                                                 |                                                               |          |
|----------|-------------------------|-------------------------------------------------|---------------------------------------------------------------|----------|
| 439939   | 13095-48-2              | C)C<br>O=C(O)C(O)CCC(=O)O                       | 1-2-Hydroxyglutaric acid                                      | aromatic |
| 71       | 3184-35-8               | O=C(O)C(=O)CC<br>CC(=O)O                        | Oxoadipic acid                                                | aromatic |
| 439197   | 131-48-6                | O=C(NC1C(C(O)<br>C(O)CO)OC(O)(C<br>(=O)O)CC1O)C | N-Acetyl-Neuraminic Acid                                      | aromatic |
| 12101    | 620-17-7                | Oc1cc(CC)ccc1                                   | 3-Ethylphenol                                                 | aromatic |
| 736186   | 25522-33-<br>2/537-73-5 | O=C(O)C=Cc1cc(O)c(OC)cc1                        | Isoferulic acid                                               | aromatic |
| 9260786  |                         | O=C(Nc1ccc(CC#N)cc1)c1oc(COc2ccccc2)cc1         | n-[4-(cyanomethyl)phenyl]-5-(phenoxyethyl)furan-2-carboxamide | aromatic |
| 8742     | 138-59-0                | O=C(O)C1=CC(O)C(O)C(O)C1                        | Shikimate                                                     | aromatic |
| 27476    | 15763-06-1              | OCC1C(O)C(O)C(n2c3N=CN(C)C(=N)c3nc2)O1          | 1-Methyladenosine                                             | aromatic |
| 94154    | 488-82-4                | OC(C(O)CO)C(O)CO                                | Arabitol                                                      | aromatic |
| 2723872  | 57-48-7                 | OCC1(O)C(O)C(O)C(O)C(O)CO1                      | Fructose                                                      | aromatic |
| 11850    | 608-66-2                | OC(C(O)C(O)CO)C(O)CO                            | Galactitol                                                    | aromatic |
| 5961     | 56-85-9                 | O=C(O)C(N)CCC(=O)N                              | Glutamine                                                     | other    |
| 444266   | 110-16-7                | O=C(O)C=CC(=O)O                                 | Maleic acid                                                   | aromatic |
| 1.32E+08 | 34393-18-5              | O=C(O)C(NCC1(O)C(O)C(O)C(CO)O1)CC(C)C           | n-(1-deoxy-1-fructosyl)leucine                                | aromatic |
| 91482    | 2370-61-8               | O=C(O)C(N)Cc1c(O)cccc1                          | o-Tyrosine                                                    | other    |
| 1174     | 66-22-8                 | O=C1NC(=O)C=C<br>N1                             | Uracil                                                        | sulfury  |
| 5950     | 56-41-7                 | O=C(O)C(N)C                                     | Alanine                                                       | sulfury  |
| 69522    | 644-90-6                | O=C(O)C(N)CCC<br>CCC                            | Aminooctanoic acid                                            | aromatic |
| 865      | 583-93-<br>7/922-54-3   | O=C(O)C(N)CCC<br>C(N)C(=O)O                     | Diaminopimelic acid                                           | aromatic |
| 5610     | 51-67-2                 | Oc1ccc(CCN)cc1                                  | Tyramine                                                      | other    |
| 6057     | 60-18-4                 | O=C(O)C(N)Cc1c(O)cc1                            | Tyrosine                                                      | aromatic |



|         |                          |                                                                                                                                                                                       |                         |          |
|---------|--------------------------|---------------------------------------------------------------------------------------------------------------------------------------------------------------------------------------|-------------------------|----------|
| 81596   |                          | <chem>O=C(O)CCOc1ccc</chem><br><chem>cc1</chem>                                                                                                                                       | 3-Phenoxypropionic acid | sulfury  |
| 83697   | 13748-90-8               | <chem>O=C(O)C(O)CC(C</chem><br><chem>)C</chem>                                                                                                                                        | Hydroxyisocaproic acid  | sulfury  |
| 9547167 |                          | <chem>P(=O)(OCC(OC(=</chem><br><chem>O)CCCCCCCC=C</chem><br><chem>CC=CCCCC)CO</chem><br><chem>C(=O)CCCCCCC</chem><br><chem>CCCCCCCC)(O</chem><br><chem>O</chem>                       | PA (34:2)               | other    |
| 79101   | 118203-80-<br>8/704-15-4 | <chem>O=C(CN)N1C(C(</chem><br><chem>=O)O)CCC1</chem>                                                                                                                                  | Glycylproline           | aromatic |
| 5280805 | 153-18-4                 | <chem>O=C1C(OC2C(O)</chem><br><chem>C(O)C(O)C(COC3</chem><br><chem>C(O)C(O)C(O)C(</chem><br><chem>C)O3)O2)=C(c2cc</chem><br><chem>(O)c(O)cc2)Oc2c1</chem><br><chem>c(O)cc(O)c2</chem> | Rutin                   | sulfury  |
| 1.3508  | 118-00-3                 | <chem>O=C1NC(N)=Nc2</chem><br><chem>n(C3C(O)C(O)C(</chem><br><chem>CO)O3)cnc12</chem>                                                                                                 | Guanosine               | sulfury  |

---
